# Supplementary material for: Rapid Analysis of Saccharomyces cerevisiae Genome Rearrangements by Multiplex Ligation–Dependent Probe Amplification
Source: PLoS Genet. 2012 Mar 1;8(3):e1002539. doi: 10.1371/journal.pgen.1002539 (PMC3291544; doi:10.1371/journal.pgen.1002539)
Supplement: Table S6 — Sequences of the oligonucleotide primers for the chromosome X-R MLPA probe set. The Ty element analyzed, the position of the probe centromeric or telomeric to the element, the gene/site that the primers are homologous to and the primer sequences are listed. (XLSX) [file pgen.1002539.s010.xlsx]

## Sheet: Sheet1
Table S6 - Set of ChrX-R MLPA Probes
Ty Locus Target	(C)entromeric/(T)elomeric	Gene	Systematic Name	Left Probe Oligo	Right Probe Oligo	Length of Ligated Product
YJRWTy1-1/YJRWTy1-2	C	TES1	YJR019C	GGGTTCCCTAAGGGTTGGAGCAAGTATGTGGATGCGTTTCAATACGGAGTCATGGAGTAC	CAATTCCCCAAGGACATGTTCTACTCGGCAAGACACACCGACGAGCTGGATTCTAGATTGGATCTTGCTGGCAC	134
YJRWTy1-1/YJRWTy1-2	T	YJR030C	YJR030C	GGGTTCCCTAAGGGTTGGACGAGCTTCGAGACTCTGTTAAAACGATTAC	TCGTTGTCTGTGAGTCCCATAGCAGGTATCTAGATTGGATCTTGCTGGCAC	100
YJRWdelta14	C	POL32	YJR043C	GGGTTCCCTAAGGGTTGGACCATCCATGGCCAAGAAATTAATGTTTGAC	TATTACAAACAGACCACCAATGCCAAATACAACTGCGTAGTCTAGATTGGATCTTGCTGGCAC	112
YJRWdelta14	T	VPS55	YJR044C	GGGTTCCCTAAGGGTTGGACTGACTTCATGTCCGATTCATCAAACACTGGCCAAGATC	TGGCTCACTTCCTTACAGGAATGCTGGTGACAAGCGGTATAGCACTCTCTAGATTGGATCTTGCTGGCAC	128
YJRCdelta15	C	OSM1	YJR051W	GGGTTCCCTAAGGGTTGGACTGGTTTGGCAGGCTTAACCACAAGTAATCGTCTCATTAG	TAAATACAGAATTCCTGTTGTGCTTTTGGATAAGGCGGCTTCTATTGGTGGGAATCTAGATTGGATCTTGCTGGCAC	136
YJRCdelta15	T	RAD7	YJR052W	GGGTTCCCTAAGGGTTGGAGATGAAATTGGAACAGGTAGTGGTACCGAGACA	GAAAGAGCTCAGGTTTCCTACGATGCCAGGATGAAATTAGTCCCTGCTGTCTAGATTGGATCTTGCTGGCAC	124
YJRCdelta16/YJRWdelta17	C	YJR054W	YJR054W	GGGTTCCCTAAGGGTTGGATTTATACACCAATGAAAGCGTACTTCAGGGAGCCTGAT	CTTCCGAGGAAGGGTTTGCTGGAAGATGAAGATCGTTCTAGATTGGATCTTGCTGGCAC	116
YJRCdelta16/YJRWdelta17	T	HIT1	YJR055W	GGGTTCCCTAAGGGTTGGATAGCGCAGAATTGCAAGAGCTGTTGAAAT	ACAACACGGTGAAGTTCCATTTGGCAAAGGTTTATAGTCTAGATTGGATCTTGCTGGCAC	108
YJRWdelta18/YJRCdelta19	T	YJR056C	YJR056C	GGGTTCCCTAAGGGTTGGACAAGTTTACCTCCAGAGCAACCTCCTACAAAGCAAGCGATT	GAGAGTCTTAATTTGGAACTTTCTCAAGAGTTCAAGCTAGCCGCCAATGTCTAGATTGGATCTTGCTGGCAC	132
YJRWdelta20	T	CDC8	YJR057W	GGGTTCCCTAAGGGTTGGAGAATGGATTTGGATTGGTGCTTGCAACCCGATGT	AGGGTTGCTGAAACCGGATTTGACATTATCTAGATTGGATCTTGCTGGCAC	104
TEL10R	C	PGU1	YJR153W	GGGTTCCCTAAGGGTTGGAGGTTTCTGGGCTGAAAATAACCATGTTATCAACTCTGACAAC	GGGTTGAGAATAAAAACCGTAGAAGGTGCGACAGGCTCTAGATTGGATCTTGCTGGCAC	120
