# Supplementary material for: Rapid Analysis of Saccharomyces cerevisiae Genome Rearrangements by Multiplex Ligation–Dependent Probe Amplification
Source: PLoS Genet. 2012 Mar 1;8(3):e1002539. doi: 10.1371/journal.pgen.1002539 (PMC3291544; doi:10.1371/journal.pgen.1002539)
Supplement: Table S11 — MLPA analysis of 21 independent spore clones isolated from an rtt109Δ+chromosome VIII diploid. Twenty-one independent spore clones were obtained by sporulation of an rtt109Δ+chromosome VIII diploid. Each spore clone was grown in liquid YPD media and then the culture was plated on both YPD and GCR selective plates, and then one colony from each plate was analyzed for the presence of chromosome arm duplications, deletions, and whole chromosome duplications using MLPA. The culture/isolate name, the events present in each initial spore clone, the events observed in the YPD plate isolate and each GCR selective plate isolate and the GCR rate of each culture are indicated. Whole chromosome duplications are labeled “+” chromosome # and chromosome arm duplications or deletions are labeled as “+” or “−” chromosome # R or L. (XLSX) [file pgen.1002539.s015.xlsx]

## Sheet: Sheet1
Table S11 - MLPA results from the analysis of 21 independent spore isolates from rtt109Δ +8 diploids
Isolatea	Events in Initial Fluctuation Cultureb	Events in YPD Cultureb	Events in GCR Cultureb	GCR Ratesc
RDKY7709-1	+8	+8	-5L, +12R,+8	2.10585e-06
RDKY7709-2	+8	+8	-5L, +16R, +8	6.25698e-06
RDKY7709-3	+8	+8	-5L, +10R, +8	7.60137e-07
RDKY7709-4	+8	+8	-5L, +5R, +8	1.60778e-06
RDKY7709-5	+8	+8	-5L, +3R, +8	2.88292e-06
RDKY7709-6	+8	+8	-5L, +12R, +8	3.87056e-06
RDKY7709-7	+8	+8	-5L, +14L, +8	1.58152e-06
RDKY7710-1	+8	+8	-5L, +12R, +8	2.85074e-06
RDKY7710-2	-	-	-5L, +3R	1.31801e-06
RDKY7710-3	+8	+8	-5L, +5R, +8	1.52084e-06
RDKY7710-4	+8	+8	-5L, +3R, +8	3.09213e-06
RDKY7710-5	-	-	-5L, +10R, +12	2.2489e-06
RDKY7710-6	+9	+9	-5L, +5R, +9	3.61088e-06
RDKY7710-7	+8	+8	-5L, +12R, +8	2.46702e-06
RDKY7711-1	+8	+8	-5L, +14L, +8	2.19018e-06
RDKY7711-2	-	-	-5L, +3L, +12	1.14009e-06
RDKY7711-3	-	-	-5L, +12L, +12	1.01275e-06
RDKY7711-4	-	-	-5L, +3R, +8L, +8Rd	1.13951e-06
RDKY7711-5	+8	+8	-5L, +8L, +8	1.42177e-06
RDKY7711-6	+8	+8	-5L, +12R, +8	2.15854e-06
RDKY7711-7	+8	+8	-5L, +4R, +8	3.10765e-06
a 7 isolates each from the indicated RDKY strains were isolated from random sporulations, tested for mating type MATa, and then used in the initial starting culture for the fluctuation tests.
b Events are relative to the indicated chromosome number. "+": duplication, "-": deletion, "L": specifically left arm, "R": specifically right arm. Single "-" indicates no event. For example, "+8" indicates a whole chromosome duplication of chrVIII, "+8R" a duplication of the right arm of chrVIII, and "-" indicates no event.
c measured in events/cell/generation
d Isolate had duplicated telomeric ends of chrVIII but did not have duplicated centromeric regions of the chromosome
